1 **Using the basic reproduction number to assess the risk of**  
2 **transmission of lumpy skin disease virus by biting insects**

3

4 Simon Gubbins\*

5 *The Pirbright Institute, Ash Road, Pirbright, Surrey GU24 0NF, U.K.*

6

7

8 \* Corresponding author (email: [simon.gubbins@pirbright.ac.uk](mailto:simon.gubbins@pirbright.ac.uk); Tel. +44 1483 232441; Fax

9 +44 1483 232448); ORCID: 0000-0003-0538-4173

10

11

12 Short running title:  $R_0$  for LSDV

13

## 14 **Summary**

15 In recent years, lumpy skin disease virus (LSDV) has emerged as a major threat to cattle  
16 outside Africa, where it is endemic. Although evidence suggests that LSDV is transmitted by  
17 the bites of blood sucking arthropods, few studies have assessed the risk of transmission  
18 posed by particular vector species. Here this risk is assessed by calculating the basic  
19 reproduction number ( $R_0$ ) for transmission of LSDV by five species of biting insect: the  
20 stable fly, *Stomoxys calcitrans*, the biting midge, *Culicoides nubeculosus*, and three mosquito  
21 species, *Aedes aegypti*, *Anopheles stephensi* and *Culex quinquefasciatus*. Parameters relating  
22 to mechanical transmission of LSDV were estimated using new analyses of previously-  
23 published data from transmission experiments, while vector life history parameters were  
24 derived from the published literature. Uncertainty and sensitivity analyses were used to  
25 compute  $R_0$  for each species and to identify those parameters which influence its magnitude.  
26 Results suggest that *S. calcitrans* is likely to be the most efficient at transmitting LSDV, with  
27 *Ae. aegypti* also an efficient vector. By contrast, *C. nubeculosus*, *An. stephensi*, and *Cx.*  
28 *quinquefasciatus* are likely to be inefficient vectors of LSDV. However, there is considerable  
29 uncertainty associated with the estimates of  $R_0$ , reflecting uncertainty in most of the  
30 constituent parameters. Sensitivity analysis suggests that future experimental work should  
31 focus on estimating the probability of transmission from insect to bovine and on the virus  
32 inactivation rate in insects.

33

34 **Keywords:** cattle; epidemiology; transmission model; Bayesian methods; uncertainty  
35 analysis; sensitivity analysis

36

37 **1 Introduction**

38 Lumpy skin disease (LSD) is an important transboundary disease of cattle and is caused by  
39 lumpy skin disease virus (LSDV). Historically, LSD outbreaks have largely been confined to  
40 Africa (EFSA Panel on Animal Health and Welfare, 2015), where the disease contributes to  
41 rural poverty and food insecurity (Tuppurainen & Oura, 2012; Molla, de Jong, Gari &  
42 Frankena, 2017). In recent years, however, LSDV has emerged as a major threat to cattle  
43 outside of Africa. In 2012 it spread to the Middle East, through Israel and the Lebanon,  
44 reaching Turkey in 2013 (Alkhamis & VanderWaal, 2016). In 2015, the first cases of LSD  
45 were reported in Greece (Tasioudi et al., 2016) and the virus subsequently spread to much of  
46 the Balkans (Mercier et al., 2018).

47

48 Evidence from the field and from experiments indicates that transmission of LSDV by most  
49 direct and indirect routes is inefficient (Weiss, 1968; Carn & Kitching, 1995). The principal  
50 transmission route for LSDV is believed to be via the bites of blood sucking arthropods  
51 (Tuppurainen & Oura, 2012; EFSA Panel on Animal Health and Welfare, 2015). This has  
52 been shown experimentally for *Aedes aegypti* mosquitos (Chihota, Rennie, Kitching &  
53 Mellor, 2001) and for *Rhipicephalus appendiculatus* male ticks (Tuppurainen et al., 2013).  
54 The stable fly, *Stomoxys calcitrans*, has been incriminated as a potential vector in Israel by  
55 comparing its seasonal abundance with the seasonality of LSD cases (Kahana-Sutin,  
56 Klement, Lensky & Gottlieb, 2017) and because of its ability to transmit the closely related  
57 capripox virus between sheep and goats (Kitching & Mellor, 1986; Mellor, Kitching &  
58 Wilkinson, 1987). The potential for the biting midge, *Culicoides nubeculosus*, and two other  
59 mosquito species, *Culex quinquefasciatus* and *Anopheles stephensi*, to transmit LSDV has  
60 also been assessed, though for these three species attempts at transmission were unsuccessful  
61 (Chihota, Rennie, Kitching & Mellor, 2003).

62

63 In this study, the risk of transmission of LSDV posed by different insect species is explored  
64 by estimating the basic reproduction number for five species of biting insect (*S. calcitrans*, *C.*  
65 *nubeculosus*, *Ae. aegypti*, *An. stephensi* and *Cx. quinquefasciatus*). These species were  
66 selected as their potential role in LSDV transmission has been investigated previously  
67 (Chihota, Rennie, Kitching & Mellor, 2001, 2003) and they represent insect species (or at  
68 least genera) that are relevant to Europe. The basic reproduction number, denoted by  $R_0$ , is  
69 the “average number of secondary cases arising from the introduction of a single infected  
70 individual into an otherwise susceptible population” (Diekmann & Heesterbeek, 2000). An  
71 outbreak can occur only if  $R_0 > 1$  and, consequently,  $R_0$  provides a means to assess the risk  
72 posed by each vector species.

73

74 Using a transmission model, an expression for  $R_0$  is derived that shows how it relates to the  
75 underlying transmission processes in insect vectors and cattle. These constituent parameters  
76 are then estimated using data from the published literature. In particular, data from  
77 transmission experiments involving the five putative vector species (Chihota, Rennie,  
78 Kitching & Mellor, 2001, 2003) are re-analysed using Bayesian methods to quantify the  
79 uncertainty in parameters relating to mechanical transmission. In addition, the latent and  
80 infectious periods for LSDV are estimated from the outcome of challenge experiments  
81 (Tuppurainen, Venter & Coetzer, 2005; Babiuk et al., 2008), again using Bayesian methods.  
82 Finally, uncertainty and sensitivity analyses are used to calculate  $R_0$  and to determine which  
83 of the constituent parameters has the greatest influence on its magnitude.

84

## 85 **2 Materials and methods**

### 86 **2.1 Basic reproduction number for LSDV**

87 For an infection transmitted mechanically by biting insects the basic reproduction number can  
88 be written as,

$$89 \quad R_0 = \sqrt{\frac{ba}{(\gamma + \mu)} \times \frac{\beta ma}{r_I}}. \quad (1)$$

90 A full mathematical derivation of this expression for  $R_0$ , including the transmission model on  
91 which it is based, is presented in the supporting information (Text S1). However, the  
92 expression, (1), can be understood heuristically as follows. After it feeds on an infected  
93 animal, an insect remains infected (and infectious) until the virus becomes inactivated or it  
94 dies, a period which lasts on average  $1/(\gamma + \mu)$  days, where  $\gamma$  is the virus inactivation rate and  $\mu$   
95 is the vector mortality rate. During this time it will bite susceptible cattle  $a$  times per day  
96 (where  $a$  is the reciprocal of the time interval between blood meals) and a proportion,  $b$ , of  
97 these bites (i.e. the probability of transmission from insect to bovine) will result in a newly  
98 infected host. Once infected, a bovine will remain infectious for the duration of its infectious  
99 period, which lasts  $1/r_I$  days on average. During this time the host will be bitten by  
100 susceptible insects on average  $m \times a$  times per day (here  $m = N/H$  is the vector to host ratio and  
101  $N$  and  $H$  are the number of vectors and hosts, respectively), a proportion,  $\beta$ , of which will  
102 result in a newly infected vector (i.e. the probability of transmission from bovine to insect).

103

## 104 **2.2 Mechanical transmission of LSDV by insects**

105 Data on mechanical transmission of lumpy skin disease virus to cattle by five species of  
106 biting insect (*S. calcitrans*, *C. nubeculosus*, *Ae. aegypti*, *An. stephensi* and *Cx.*  
107 *quinquefasciatus*) were extracted from the published literature (Chihota, Rennie, Kitching &  
108 Mellor, 2001, 2003). This provided the number of positive insects (i.e. those for which viral  
109 DNA was detected; virus isolation was only carried out for a small number of pooled  
110 samples) and the number of insects tested after feeding on a LSDV-infected bovine (*S.*

111 *calcitrans*, *C. nubeculosus* or *Ae. aegypti*) or a blood-virus mix via a membrane (*An.*  
112 *stephensi* and *Cx. quinquefasciatus*) at each day post feeding (Table S1). It also provided  
113 information on whether or not transmission occurred when batches of insects that had  
114 previously fed on an infected animal or received an infected blood meal were allowed to  
115 refeed on a naïve bovine (Table S1).

116

117 These data were used to estimate the virus inactivation rate ( $\gamma$ ), the probability of  
118 transmission from bovine to insect ( $\beta$ ) and the probability of transmission from insect to  
119 bovine ( $b$ ) for each species. Parameters were estimated in a Bayesian framework to facilitate  
120 the incorporation of uncertainty in estimates of  $R_0$ . The likelihood for the data is given by,

$$121 \quad L(\gamma, \beta, b) = \prod_i \binom{N_i}{Y_i} p_i^{Y_i} (1-p_i)^{N_i-Y_i} \times \quad (2)$$
$$\prod_j q_j^{I_j} (1-q_j)^{1-I_j},$$

122 where  $Y_i$  and  $N_i$  are the number of positive insects and number of insects tested at  $t_i$  days post  
123 feeding, respectively, and  $I_j$  is a variable indicating whether ( $I_j=1$ ) or not ( $I_j=0$ ) transmission  
124 occurred when insects were allowed to refeed on naïve animal  $j$  at  $t_j$  days post initial feed. In  
125 equation (2),

$$126 \quad p_i = \beta \exp(-\gamma t_i), \quad (3)$$

127 is the probability that an insect is positive at  $t_i$  days post feeding and,

$$128 \quad q_j = 1 - (1 - b\beta \exp(-\gamma t_j))^{n_j}, \quad (4)$$

129 is the probability that transmission occurred from infected insects to bovine  $j$  at  $t_j$  days post  
130 initial feed. The probability, (3), is the probability that an insect became infected ( $\beta$ )  
131 multiplied by the probability that it was still infected when tested ( $\exp(-\gamma t_i)$ ). The probability,  
132 (4), is the probability that at least one insect (out of the  $n_j$  feeding) transmitted LSDV, where  
133 the probability that an individual insect will transmit LSDV is the product of the probabilities

134 that it became infected ( $\beta$ ), that it was still infected when refeeding occurred ( $\exp(-\gamma t_j)$ ) and  
135 that it subsequently transmitted LSDV to the animal during refeeding ( $b$ ). Non-informative  
136 priors were assumed for all three parameters: exponential with mean 100 for  $\gamma$  and uniform  
137 with range (0,1) for  $b$  and  $\beta$ .

138

139 Samples from the joint posterior density were generated using an adaptive Metropolis scheme  
140 (Haario, Saksman & Tamminen, 2001), modified so that the scaling factor was tuned during  
141 burn-in to ensure an acceptance rate of between 20% and 40% for more efficient sampling of  
142 the target distribution (Andrieu & Thoms, 2008). Two chains of 50,000 iterations were run,  
143 with the preceding 10,000 iterations discarded to allow for burn-in of the chain. The chains  
144 were then thinned (taking every fifth sample) to reduce autocorrelation amongst the samples.  
145 The adaptive Metropolis scheme was implemented in Matlab (version R2018a; The  
146 Mathworks Inc.). Convergence of the scheme was assessed visually and by examining the  
147 Gelman-Rubin statistic provided in the coda package (Plummer, Best, Cowles & Vines,  
148 2006) in R (R Core Team, 2018).

149

### 150 **2.3 Latent and infectious periods for LSDV in cattle**

151 The mean infectious period ( $1/r_I$ ) for LSDV in cattle was estimated using data from  
152 experimental infections (Tuppurainen, Venter & Coetzer, 2005; Babiuk et al., 2008). Three  
153 proxy measures of infectiousness were considered: detection of viral DNA in blood by PCR;  
154 detection of virus in blood by virus isolation (VI) in cell culture; and detection of virus (by  
155 transmission electron microscopy) or viral DNA (by PCR) in skin lesions. For each animal,  
156 the minimum infectious period was calculated as the time between the first positive and last  
157 positive samples, while the maximum infectious period was calculated as the time between

158 the last negative and first subsequent negative sample for each measure (i.e. accounting for  
159 sampling frequency) (Table S2).

160

161 Although it is not needed for the calculation of  $R_0$  (see equation (1)), the mean latent period  
162 was also estimated for each proxy measure using data from experimental infections of cattle  
163 (Chihota, Rennie, Kitching & Mellor, 2001; Tuppurainen, Venter & Coetzer, 2005; Babiuk et  
164 al., 2008). In this case, the shortest latent period was the time of the last negative sample and  
165 the longest latent period was the time of the first positive sample for each measure (i.e.  
166 detection of viral DNA in blood, detection of virus in blood and appearance of skin lesions)  
167 (Table S2).

168

169 The infectious period was assumed to follow a gamma distribution with mean duration  $1/r_I$   
170 and shape parameter  $n_I$ , while the latent period was assumed to follow a gamma distribution  
171 with mean duration  $1/r_E$  and shape parameter  $n_E$  (see Text S1). Parameters (i.e. mean and  
172 shape parameter) for each proxy measure were estimated using Bayesian methods, with the  
173 likelihood given by,

174 
$$L(r_i, n_i) = \prod_j \int_{t_{\min}^{(j)}}^{t_{\max}^{(j)}} f(\tau) d\tau, \quad (5)$$

175 where  $t_{\min}$  and  $t_{\max}$  are the minimum and maximum infectious period ( $i=I$ ) or latent period  
176 ( $i=E$ ) for an animal, respectively, and  $f$  is the probability density function for the gamma  
177 distribution. Non-informative priors (exponential with mean 100) were assumed for both the  
178 mean and the shape parameter.

179

180 Samples from the joint posterior distribution were generated using a random walk  
181 Metropolis-Hastings algorithm (Andrieu & Thoms, 2008), with each parameter updated in



182 turn. Two chains of 20,000 iterations were run, with the preceding 5,000 iterations discarded  
183 to allow for burn-in of the chain. The chains were then thinned (taking every other sample) to  
184 reduce autocorrelation amongst the samples. The Metropolis-Hastings scheme was  
185 implemented in Matlab (version R2018a; The Mathworks Inc.). Convergence of the scheme  
186 was assessed visually and by examining the Gelman-Rubin statistic provided in the coda  
187 package (Plummer, Best, Cowles & Vines, 2006) in R (R Core Team, 2018).

188

#### 189 **2.4 Vector life history parameters**

190 Life history parameters, specifically the reciprocal of the time interval between blood meals  
191 ( $a$ ), the vector to host ratio ( $m$ ) and the vector mortality rate ( $\mu$ ), were estimated for *S.*  
192 *calcitrans*, *C. nubeculosus*, *Ae. aegypti*, *An. stephensi* and *Cx. quinquefasciatus*. For each  
193 parameter, plausible ranges were derived from the published literature (Table 1), so they  
194 could be incorporated in the uncertainty and sensitivity analysis.

195

#### 196 **2.5 Uncertainty and sensitivity analyses**

197 Replicated Latin hypercube sampling (LHS) was used to explore the parameters influencing  
198 the basic reproduction number,  $R_0$  for each insect species and proxy measure of  
199 infectiousness (Blower & Dowlatabadi, 1994; Luz, Codeco, Massad & Struichner, 2003;  
200 Gubbins et al., 2008). Parameters were sampled either from their marginal posterior  
201 distributions ( $b$ ,  $\beta$ ,  $\gamma$  and  $1/r_i$ ) or uniformly from plausible ranges ( $a$ ,  $m$  and  $\mu$ ). The LHS  
202 results were used to compute the median and 95% prediction interval for  $R_0$ . The sensitivity  
203 of  $R_0$  to changes in each parameter was assessed by calculating the partial rank correlation  
204 coefficients (PRCCs). The uncertainty and sensitivity analyses were implemented in Matlab  
205 (version R2018a; The Mathworks Inc.).

206

## 207 **3 Results**

### 208 **3.1 Mechanical transmission of LSDV by insects**

209 The model, (3), adequately captured the data for all five species of biting insect, with the  
210 observed number of positive insects lying within the 95% credible intervals for the posterior  
211 predictive distribution (Figure 1). Although there is uncertainty associated with all the  
212 parameters related to mechanical transmission, there are still clear differences amongst the  
213 species (Figure 2). The virus inactivation rate is lowest for *Ae. aegypti* ( $0.08 \text{ day}^{-1}$ ),  
214 intermediate for *An. stephensi* ( $0.2 \text{ day}^{-1}$ ) and *Cx. quinquefasciatus* ( $0.3 \text{ day}^{-1}$ ) and highest for  
215 *S. calcitrans* ( $1.6 \text{ day}^{-1}$ ) and *C. nubeculosus* ( $71.4 \text{ day}^{-1}$ ) (Table 2). The probability of  
216 transmission from bovine to insect is highest for the three mosquito species, lower for *S.*  
217 *calcitrans* and lowest for *C. nubeculosus* (Table 2; Figure 2).

218

219 There is considerable uncertainty in the estimates for the probability of transmission from  
220 insect to bovine for all five insect species (Figure 2; Table 2). The posterior mode was non-  
221 zero only for *Ae. aegypti*, though the probability of transmission from insect to bovine could  
222 not be precisely estimated for this species (Figure 2). The posterior median for the probability  
223 of transmission from insect to bovine was low for *An. stephensi* (0.03) and *Cx.*  
224 *quinquefasciatus* (0.04), though the upper 95% credible limit for both species is an order of  
225 magnitude higher (Figure 2; Table 2). Finally, the probability of transmission from insect to  
226 bovine could not be reliably estimated for either *S. calcitrans* or *C. nubeculosus* (Figure 2;  
227 Figure S1). This is, in part, because the number of insects refeeding when attempting  
228 transmission to cattle was not reported for these species (Chihota, Rennie, Kitching & Mellor,  
229 2003). For *C. nubeculosus*, the posterior distribution for the probability of transmission from  
230 insect to bovine was identical to the prior distribution (Figure S1), regardless of assumptions  
231 made about the numbers of insects that refed (either 1, 5, 10, 20, 50 or 100). For *S. calcitrans*

232 the posterior mass for the probability of transmission from insect to bovine was shifted  
233 towards zero if a larger number of insects was assumed to refeed, though the 95% credible  
234 interval remained large (Figure S1). For both species, estimates for the virus inactivation rate  
235 and probability of transmission from bovine to insect were not affected by the number of  
236 insects assumed to refeed (Figure S1). In the uncertainty and sensitivity analyses for these  
237 species, the posterior distributions for parameters related to mechanical transmission ( $b$ ,  $\beta$  and  
238  $\gamma$ ) were those obtained when 100 insects were assumed to refeed, as this provides the most  
239 conservative assessment of the risk they pose.

240

### 241 **3.2 Latent and infectious periods for LSDV in cattle**

242 The mean infectious period depends on the proxy measure used to determine when an animal  
243 is infectious (Table 3). It is shortest when based on virus isolation from blood (8.8 days),  
244 intermediate when based on detection of viral DNA in blood (16.3 days) and longest when  
245 based on detection of virus or viral DNA in skin lesions (23.1 days). The mean latent period  
246 also depends on the proxy measure used to determine when an animal is infectious. It was  
247 estimated to be 5.8 days for blood (PCR), 8.1 days for blood (VI) and 7.3 days for skin  
248 lesions (Table 3).

249

### 250 **3.3 Uncertainty and sensitivity analyses**

251 The basic reproduction number for LSDV was highest for transmission by *S. calcitrans*,  
252 intermediate for *Ae. aegypti*, low for *C. nubeculosus* and *An. stephensi* and lowest *Cx.*  
253 *quinquefasciatus* (Figure 3; Table 4). Indeed, the median  $R_0$  for *Cx. quinquefasciatus* was  
254 below the threshold for an outbreak to occur (i.e.  $R_0=1$ ). The magnitude of  $R_0$  depended on  
255 the proxy measure of infectiousness used (through its influence on the duration of  
256 infectiousness), with higher values when based on detection of virus or viral DNA in skin

257 lesions, intermediate when based on detection of viral DNA in blood and lowest when based  
258 on detection of virus in blood (Figure 3; Table 4).

259

260 The sensitivity of  $R_0$  to changes in its constituent parameters differed amongst the insect  
261 species, though some patterns emerge (Figure 4). For all species, the strongest correlations  
262 were with the probability of transmission from insect to bovine ( $b$ ; PRCC>0.66), the biting  
263 rate ( $a$ ; PRCC>0.75, except for *Ae. aegypti*), the vector to host ratio ( $m$ ; PRCC>0.58) and the  
264 virus inactivation rate ( $\gamma$ ; PRCC<-0.47, except *An. stephensi* and *Cx. quinquefasciatus*). For  
265 the three mosquito species, there was also correlation with the vector mortality rate ( $\mu$ ;  
266 PRCC<-0.45), but this was not the case for the other dipteran species (PRCC $\approx$ 0). The  
267 probability of transmission from bovine to insect ( $\beta$ ) and the mean infectious period ( $1/r_I$ )  
268 were also positively correlated with  $R_0$  (PRCC=0.3-0.4 and PRCC=0.2-0.5, respectively).  
269 These patterns are independent of the proxy measure of infectiousness used (Figure 4).

270

#### 271 **4 Discussion**

272 The results of the uncertainty analysis for the basic reproduction number (Figure 3; Table 4)  
273 suggest that *S. calcitrans* is likely to be the most efficient vector of LSDV (out of the five  
274 species considered in the present study), with *Ae. aegypti* also an efficient vector of the virus.  
275 By contrast, *C. nubeculosus*, *An. stephensi* and *Cx. quinquefasciatus* are likely to be  
276 inefficient as vectors of LSDV.

277

278 These conclusions would potentially be different if the risk posed by each species was  
279 assessed on the outcome of the transmission experiments alone (Table 2). While the  
280 experimental outcome suggests *Ae. aegypti* might be an efficient vector, it could be  
281 concluded that *S. calcitrans* is likely to be a poor vector given the very short duration of

282 infection (<1 day) and the comparatively low probabilities of transmission from bovine to  
283 insect or insect to bovine for this species. By contrast, the results of the transmission  
284 experiments suggest that *Cx. quinquefasciatus* could be a more efficient vector than it is  
285 based on the estimates for  $R_0$ , because of the relatively long duration of infection and the high  
286 probability of transmission from bovine to insect. This highlights the importance of  
287 considering all factors associated with transmission, including vector life history, when  
288 assessing the risk of transmission for each species. For both *S. calcitrans* and *Cx.*  
289 *quinquefasciatus* the main reason for the difference in conclusions between transmission  
290 experiments and  $R_0$  is the time interval between blood meals, which is shorter than the  
291 duration of infection for *S. calcitrans*, but longer than the duration of infection for *Cx.*  
292 *quinquefasciatus* (Tables 1 & 2).

293

294 A certain amount of care should be taken in interpreting these results, however, because there  
295 is substantial uncertainty associated with the estimates of  $R_0$  for all five species, but  
296 especially for *S. calcitrans* and *C. nubeculosus*. One of the major sources of uncertainty is the  
297 probability of transmission from insect to bovine (Figure 2; Table 2). Although transmission  
298 to naïve cattle was attempted (Chihota, Rennie, Kitching & Mellor, 2003), it was done at  
299 times when *S. calcitrans* and *C. nubeculosus* were unlikely to still be infectious (see Figure 1;  
300 refeeding was at 1-3 days post infection for *S. calcitrans* and 3-5 days post infection for *C.*  
301 *nubeculosus*). Consequently, there is little information in the data to estimate this parameter,  
302 which is reflected in the posterior distributions being almost the same as the prior  
303 distributions, especially in the case of *C. nubeculosus* (Figure 2; Figure S1). Yet the  
304 probability of transmission from insect to bovine was identified as one of the parameters to  
305 which the basic reproduction number is most sensitive for all five vector species considered  
306 (Figure 4).

307

308 The influence of the virus inactivation rate and vector mortality rate on  $R_0$  differed amongst  
309 the species (Figure 4). The duration of infection (i.e. the reciprocal of the virus inactivation  
310 rate) for *C. nubeculosus* or *S. calcitrans* is much shorter than the lifespan of an insect and,  
311 consequently, only the virus inactivation rate is important for determining the magnitude of  
312  $R_0$ . By contrast, the duration of infection and insect lifespan are comparable for *Ae. aegypti*,  
313 *An. stephensi* and *Cx. quinquefasciatus*, so that both of these parameters have an influence on  
314 the basic reproduction number.

315

316 As with all uncertainty and sensitivity analyses, the conclusions drawn from them are valid  
317 only over the parameter ranges considered. For parameters related to mechanical  
318 transmission, these ranges were estimated from the available data on the outcome of  
319 transmission experiments (Chihota, Rennie, Kitching & Mellor, 2001, 2003) and so represent  
320 the best current estimates. Given the uncertainty in these parameters (which reflects the small  
321 numbers of animals and insects tested at each time point in the studies; Table S1), a focus of  
322 future experimental work should be to more precisely measure parameters related to  
323 mechanical transmission and, in particular, the probability of transmission from insect to  
324 bovine and the virus inactivation rate.

325

326 All three vector life history parameters were identified as influencing the magnitude of  $R_0$   
327 (Figure 4). Plausible ranges for these parameters were drawn from the published literature  
328 (Table 1). Wherever possible, ranges were derived using data relating to the species  
329 themselves. If suitable data were not available, however, ranges were derived using data for  
330 related species. In addition, the vector life parameters were assumed to be constant, but they  
331 will depend on environmental factors, including temperature and rainfall. Consequently, the

332 basic reproduction number, and so the risk of transmission, is unlikely to be constant over  
333 space or time, but will vary both geographically and seasonally.

334

335 This study considered the potential of five species of biting insects to transmit LSDV. This  
336 was primarily because their ability to transmit LSDV had been assessed experimentally for  
337 each of the species. However, the present analysis did not consider the effect of vector  
338 feeding preferences on their potential role in transmission. The stable fly, *S. calcitrans*, is one  
339 of the most damaging arthropod pests of cattle worldwide, both through its impact on  
340 production (Taylor, Moon & Mark, 2012) and its ability to transmit a number of pathogens  
341 (Baldacchino et al., 2013). Consequently, this species' feeding preferences are unlikely to  
342 affect its efficiency as a vector of LSDV. Similarly, *C. nubeculosus* and other *Culicoides*  
343 species for which *C. nubeculosus* can be considered a model are livestock-associated (Lassen,  
344 Nielsen & Kristensen, 2012; Purse, Carpenter, Venter, Bellis & Mullens, 2015), suggesting  
345 host preference will not reduce their efficiency as a vector of LSDV. By contrast, *Ae. aegypti*  
346 feeds primarily on humans (Reiter, 2010), potentially limiting its role in the transmission of  
347 LSDV, despite its apparent efficiency as a vector. However, there are other *Aedes* species (for  
348 example, *Ae. cinereus* or *Ae. vexans*), which display a preference for feeding on cattle  
349 (Hayes, Tempelis, Hess & Reeves, 1973; Magnarelli, 1977) and for which *Ae. aegypti* could  
350 act as a model vector species. Many *Anopheles* species, including those in the *Maculipennis*  
351 subgroup, which is of most relevance to Europe (Sinka et al., 2010; ECDC, 2019), are  
352 described as zoophilic (Sinka et al., 2010). Accordingly, host preference is unlikely to limit  
353 their ability to transmit LSDV. Finally, host preference in *Cx. quinquefasciatus* varies  
354 according to environmental conditions and geographical area, though it does feed on  
355 mammals (Hayes, Tempelis, Hess & Reeves, 1973; Molaei, Huang & Andreadis, 2012;  
356 Janssen et al., 2015). However, any preference for non-bovine hosts in this species (or other

357 *Culex* species for which it is a suitable model) will only further reduce its importance in the  
358 transmission of LSDV.

359

360 The magnitude of the basic reproduction number depends on the proxy measure used for  
361 infectiousness (Figure 3). Viral titres in blood can be low and detection of virus intermittent  
362 (Tuppurainen, Venter & Coetzer, 2005; Babiuk et al., 2008), suggesting this may not be the  
363 best proxy measure. By contrast, skin nodules have high titres of virus (Babiuk et al., 2008)  
364 and insects which feed on nodules become infected (Chihota, Rennie, Kitching & Mellor,  
365 2001, 2003), indicating that this may be a reasonable proxy measure. This could be tested  
366 experimentally by feeding insects on areas with and without lesions of clinically-affected  
367 cattle and on infected, but subclinical cattle and relating viral titres in skin and blood to the  
368 probability of insects becoming infected.

369

370 The expression for the basic reproduction number presented in equation (1) assumes there is  
371 negligible disease-associated mortality in cattle (see Text S1). Reported mortality for LSD  
372 outbreaks in the Balkans was very low, with the median within-herd mortality being zero in  
373 all affected countries (EFSA, 2017). In endemic settings, mortality is generally low (1-3%)  
374 (Tuppurainen & Oura, 2012; Molla, Frankena & de Jong, 2017), but it may sometimes reach  
375 40% (Tuppurainen & Oura, 2012). If disease-associated mortality (up to 40%) is included in  
376 the computation of  $R_0$ , it does not greatly affect the conclusions of the present study regarding  
377 either the magnitude of  $R_0$  for each vector species or the sensitivity of  $R_0$  to changes in its  
378 constituent parameters (see Text S2).

379



380 Two previous studies have estimated the basic reproduction number for LSDV using  
381 outbreak data. In the first, Magori-Cohen et al. (2012)<sup>1</sup> estimated  $R_0$  to be around 4 for an  
382 outbreak in a large dairy herd in Israel in 2006, where *S. calcitrans* was likely to be the  
383 principal vector species (Kahana-Sutin, Klement, Lensky & Gottlieb, 2017). Because of the  
384 control measures implemented on the farm (removal of cattle showing generalised disease on  
385 the day of detection), this implicitly assumed an infectious period of around one day. If a  
386 mean infectious period of 23 days is used instead (i.e. the maximum estimated in the present  
387 study; Table 3), the corresponding value for  $R_0$  is around 19, which is similar to the median  
388 estimate for transmission by *S. calcitrans* obtained in the present study (Figure 3; Table 4).  
389 By contrast, the second study estimated  $R_0$  to be around 1.1 for outbreaks in eight cattle herds  
390 in Ethiopia in 2014-2015, using viraemia as a proxy for infectiousness (Molla, Frankena & de  
391 Jong, 2017). This is substantially lower than the ranges estimated for either *S. calcitrans* or  
392 *Ae. aegypti*, but is consistent with those for *C. nubeculosus*, *An. stephensi* or *Cx.*  
393 *quinquefasciatus* (Figure 3; Table 4). However, the vector species involved in transmission of  
394 LSDV in Ethiopia are not known (Molla, de Jong & Frankena, 2017).

395

396 In this paper, the risk of transmission of LSDV was assessed for five species of biting insect  
397 using the basic reproduction number. The results suggest that *S. calcitrans* and *Ae. aegypti*  
398 are likely to be efficient vectors (i.e.  $R_0$  is substantially above one), while *C. nubeculosus*, *An.*  
399 *stephensi* and *Cx. quinquefasciatus* are likely to be inefficient vectors (i.e.  $R_0$  is close to or  
400 below one). However, there is considerable uncertainty associated with the estimates of  $R_0$   
401 for LSDV and future work should focus in particular on estimating the probability of  
402 transmission from insect to bovine and the virus inactivation rate. Finally, using the basic  
403 reproduction number has demonstrated that any assessment of the risk posed by an insect

---

<sup>1</sup> Because of differences in model formulation, the value of  $R_0$  presented by Magori-Cohen et al. (2012) is the square of  $R_0$  in the current paper. Here the square root transformed values are presented.

404 vector needs to consider all factors which influence its ability to transmit the virus, including

405 life history parameters.

406

407 **Funding**

408 This work was funded by the Biotechnology and Biological Sciences Research Council  
409 (BBSRC) [grant code: BB/R002606/1]. SG was also partially supported by BBSRC-funded  
410 Institute Strategic Programme grants BBS/E/I/00007033, BBS/E/I/00007036 and  
411 BBS/E/I/00007037.

412

413 **Conflict of interest**

414 None to declare.

415

416 **Acknowledgements**

417 The author is grateful to Pip Beard, Beatriz Sanz-Bernardo and Christopher Sanders (all at  
418 The Pirbright Institute) for helpful comments on the manuscript.

419

420 **References**

- 421 Alkhamis, M.A. & VanderWaal, K. (2016). Spatial and temporal epidemiology of lumpy skin  
422 disease in the Middle East, 2012-2015. *Frontiers in Veterinary Science*, 3, 19.  
423 <https://doi.org/10.3389/fvets.2016.00019>
- 424 Andrieu, C. & Thoms, J. (2008). A tutorial on adaptive MCMC. *Statistics and Computing*,  
425 18, 343-373. <https://doi.org/10.1007/s11222-008-9110-y>
- 426 Babiuk, S., Bowden, T.R., Parkyn, G., Dalman, B., Manning, L., Neufeld, J., Embury-Hyatt,  
427 C., Copps, J. & Boyle, D.B. (2008). Quantification of lumpy skin disease virus following  
428 experimental infection in cattle. *Transboundary and Emerging Diseases*, 55, 299-307.  
429 <https://doi.org/10.1111/j.1865-1682.2008.01024.x>
- 430 Baldacchino, F., Muenwom, V., Desquesnes, M., Desoli, F., Charoenviriyaphap, T. &  
431 Duvallet, G. (2013). Transmission of pathogens by *Stomoxys* flies (Diptera: Muscidae): a  
432 review. *Parasite*, 20, 26. <https://doi.org/10.1051/parasite/2013026>
- 433 Birley, M.H. & Boorman, J.P.T. (1982). Estimating the survival and biting rates of  
434 hematophagous insects, with particular reference to the *Culicoides obsoletus* group (Diptera,  
435 Ceratopogonidae) in southern England. *Journal of Animal Ecology*, 51, 135-148.  
436 <https://doi.org/10.2307/4315>
- 437 Blower, S.M. & Dowlatabadi, H. (1994). Sensitivity and uncertainty analysis of complex  
438 models of disease transmission: an HIV model as an example. *International Statistical*  
439 *Review*, 62, 229-243. <https://doi.org/10.2307/1403510>
- 440 Brady, O.J., Johansson, M.A., Guerra, C.A., Bhatt, S., Golding, N., Pigott, D.M., Delatte, H.,  
441 Grech, M.G., Leisnham, P.T., Maciel-de-Freitas, R., Styer, L.M., Smith, D.L., Scott, T.W.,  
442 Gething, P.W. & Hay, S.I. (2013). Modelling adult *Aedes aegypti* and *Aedes albopictus*  
443 survival at different temperatures in laboratory and field settings. *Parasites & Vectors*, 6,  
444 351. <https://doi.org/10.1186/1756-3305-6-351>

- 445 Braverman, Y., Linley, J. R., Marcus, R. & Frish, K. (1985). Seasonal survival and  
446 expectation of infectious life of *Culicoides* spp. (Diptera: Ceratopogonidae) in Israel, with  
447 implications for bluetongue virus transmission and a comparison of the parous rate in *C.*  
448 *imicola* from Israel and Zimbabwe. *Journal of Medical Entomology*, 22, 476-484.  
449 <https://doi.org/10.1093/jmedent/22.5.476>
- 450 Carn, V.M. & Kitching, R.P. (1995). An investigation of possible routes of transmission of  
451 lumpy skin disease virus (Neethling). *Epidemiology and Infection*, 114, 219-226.  
452 <https://doi.org/10.1017/S0950268800052067>
- 453 Charlwood, J.D., Neneh, S., Sovannaroeth, S., Morgan, J.C., Hemingway, J., Chitnis, N. &  
454 Briët, J.T. (2016). 'Nature or nurture': survival rate, oviposition interval and possible  
455 gonotrophic discordance among South East Asian anophelines. *Malaria Journal*, 15, 356.  
456 <https://doi.org/10.1186/s12936-016-1389-0>
- 457 Chihota, C.M., Rennie, L.F., Kitching, R.P. & Mellor, P.S. (2001). Mechanical transmission  
458 of lumpy skin disease virus by *Aedes aegypti* (Diptera: Culicidae). *Epidemiology and*  
459 *Infection*, 126, 317-321. <https://doi.org/10.1017/S0950268801005179>
- 460 Chihota, C.M., Rennie, L.F., Kitching, R.P. & Mellor, P.S. (2003). Attempted mechanical  
461 transmission of lumpy skin disease virus by biting insects. *Medical and Veterinary*  
462 *Entomology*, 17, 294-300. <https://doi.org/10.1046/j.1365-2915.2003.00445.x>
- 463 Diekmann, O. & Heesterbeek, J.A.P. (2000). *Mathematical epidemiology of infectious*  
464 *diseases: model building, analysis and interpretation*. Chichester: John Wiley & Sons.
- 465 ECDC (2019). European Centre for Disease Prevention and Control and European Food  
466 Safety Authority: Mosquito maps. [https://ecdc.europa.eu/en/disease-vectors/surveillance-and-](https://ecdc.europa.eu/en/disease-vectors/surveillance-and-disease-data/mosquito-maps)  
467 [disease-data/mosquito-maps](https://ecdc.europa.eu/en/disease-vectors/surveillance-and-disease-data/mosquito-maps)
- 468 EFSA (2017). Scientific report on lumpy skin disease: I. Data collection and analysis. *The*  
469 *EFSA Journal*, 15, 4773. <https://doi.org/10.2903/j.efsa.2017.4773>

- 470 EFSA Panel on Animal Health and Welfare (2015). Scientific opinion on lumpy skin disease.  
471 *The EFSA Journal*, 13, 3986. <https://doi.org/10.2903/j.efsa.2015.3986>
- 472 Gachohi, J.M., Njenga, M.K., Kitala, P. & Bett, B. (2016). Modelling vaccinations strategies  
473 against Rift Valley fever virus in livestock in Kenya. *PLoS Neglected Tropical Diseases*, 10,  
474 e0005049. <https://doi.org/10.1371/journal.pntd.0005049>
- 475 Gad, A.M., Feinsod, F.M., Soliman, B.A. & El Said, S. (1989). Survival estimates for adult  
476 *Culex pipiens* in the Nile Delta. *Acta Tropica*, 46, 173-179. [https://doi.org/10.1016/0001-  
477 706X\(89\)90034-X](https://doi.org/10.1016/0001-706X(89)90034-X)
- 478 Gerry, A.C., Mullens, B.A., MacLachlan, N.J. & Mecham, O.J. (2001). Seasonal  
479 transmission of bluetongue virus by *Culicoides sonorensis* (Diptera: Ceratopogonidae) at a  
480 southern California dairy and evaluation of vectorial capacity as a predictor of bluetongue  
481 virus transmission. *Journal of Medical Entomology*, 38, 197-209.  
482 <https://doi.org/10.1603/0022-2585-38.2.197>
- 483 Griffith, J.S.R. & Turner, G.D. (1996). Culturing *Culex quinquefasciatus* mosquitoes with a  
484 blood substitute diet for the females. *Medical and Veterinary Entomology*, 10, 265–268.  
485 <https://doi.org/10.1111/j.1365-2915.1996.tb00741.x>
- 486 Gubbins, S., Carpenter, S., Baylis, M., Wood, J.L.N. & Mellor, P.S. (2008). Assessing the  
487 risk of bluetongue to UK livestock: uncertainty and sensitivity analysis of a temperature-  
488 dependent model for the basic reproduction number. *Journal of the Royal Society Interface*,  
489 5, 363-371. <https://doi.org/10.1098/rsif.2007.1110>
- 490 Haario, H., Saksman, E. & Tamminen, J. (2001). An adaptive Metropolis algorithm.  
491 *Bernoulli*, 7, 223-242. <https://projecteuclid.org/euclid.bj/1080222083>
- 492 Hayes, R.O., Tempelis, C.H., Hess, A.D. & Reeves, W.C. (1973). Mosquito preference  
493 studies in Hale County, Texas. *American Journal of Tropical Medicine and Hygiene*, 22,  
494 270-277. <https://doi.org/10.4269/ajtmh.1973.22.270>

- 495 Jacquet, P., Rouet, D., Bouhsira, E., Salem, A., Lienard, E. & Franc, M. (2014). Population  
496 dynamics of *Stomoxys calcitrans* (L.) (Diptera: Muscidae) in southwestern France. *Revue de*  
497 *Médecine Vétérinaire*, 165, 267-271. <https://www.revmedvet.com/artdes-us.php?id=16015>
- 498 Janssen, N., Fernandez-Salas, I., Díaz González, E.E., Gaytan-Burns, A., Medina-de la  
499 Garza, C.E., Sanchez-Casas, R.M., Börstler, J., Cadar, D., Schmidt-Chanasit, J. & Jöst, H.  
500 (2015). Mammalophilic feeding behaviour of *Culex quinquefasciatus* mosquitoes collected in  
501 the cities of Chetumal and Cancun, Yucatán Peninsula, Mexico. *Tropical Medicine and*  
502 *International Health*, 20, 1488-1491. <https://doi.org/10.1111/tmi.12587>
- 503 Jones, C.E., Lounibos, P., Marra, P.P. & Kilpatrick, A.M. (2012). Rainfall influences survival  
504 of *Culex pipiens* (Diptera: Culicidae) in a residential neighbourhood in the mid-Atlantic  
505 United States. *Journal of Medical Entomology*, 49, 467-473.  
506 <https://doi.org/10.1603/ME11191>
- 507 Kahana-Sutin, E., Klement, E., Lensky, I. & Gottlieb, Y. (2017). High relative abundance of  
508 the stable fly *Stomoxys calcitrans* is associated with lumpy skin disease outbreaks in Israeli  
509 dairy farms. *Medical and Veterinary Entomology*, 31, 150-160.  
510 <https://doi.org/10.1111/mve.12217>
- 511 Killeen, G.F., McKenzie, F.E., Foy, B.D., Shieffelin, C., Billingsley, P.F. & Beier, J.C.  
512 (2000). A simplified model for predicting malaria entomologic inoculation rates based on  
513 entomologic and parasitologic parameters relevant to control. *American Journal of Tropical*  
514 *Medicine and Hygiene*, 62, 535-544. <https://doi.org/10.4269/ajtmh.2000.62.535>
- 515 Kiszewski, A., Mellinger, A., Spielman, A., Malaney, P., Ehrlich Sachs, S. & Sachs, J.  
516 (2004). A global index representing the stability of malaria transmission. *American Journal*  
517 *of Tropical Medicine and Hygiene*, 70, 486-498. <https://doi.org/10.4269/ajtmh.2004.70.486>
- 518 Kitching, R.P. & Mellor, P.S. (1986). Insect transmission of capripox virus. *Research in*  
519 *Veterinary Science*, 40, 255-258. [https://doi.org/10.1016/S0034-5288\(18\)30523-X](https://doi.org/10.1016/S0034-5288(18)30523-X)

- 520 Kunz, S.E. & Monty, J. (1976). Biology and ecology of *Stomoxys nigra* Macquart and  
521 *Stomoxys calcitrans* (L.) (Diptera, Muscidae) in Mauritius. *Bulletin of Entomological*  
522 *Research*, 66, 745-755. <https://doi.org/10.1017/S0007485300010798>
- 523 Lassen, S.B., Nielson, S.A. & Kristensen, M. (2012). Identity and diversity of blood meal  
524 hosts of biting midges (Diptera: Ceratopogonidae: *Culicoides* Latreille) in Denmark.  
525 *Parasites & Vectors*, 5, 143. <https://doi.org/10.1186/1756-3305-5-143>
- 526 Liu-Helmersson, J., Stenlund, H., Wilder-Smith, A. & Rocklöv, J. (2014). Vectorial capacity  
527 of *Aedes aegypti*: effects of temperature and implications for global dengue epidemic  
528 potential. *PLoS ONE*, 9, e89783. <https://doi.org/10.1371/journal.pone.0089783>
- 529 Luz, P.M., Codeco, C.T., Massad, E. & Struichner, C.J. (2003). Uncertainties regarding  
530 dengue modelling in Rio de Janeiro, Brazil. *Memorias do Instituto Oswaldo Cruz*, 98, 871-  
531 878. <https://doi.org/10.1590/S0074-02762003000700002>
- 532 Magnarelli, L.A. (1977). Host feeding patterns of Connecticut mosquitoes (Diptera:  
533 Culicidae). *American Journal of Tropical Medicine and Hygiene*, 26, 547-552.  
534 <https://doi.org/10.4269/ajtmh.1977.26.547>
- 535 Magori-Cohen, R., Louzoun, Y., Herziger, Y., Oron, E., Arazi, A., Tuppurainen, E., Shpigel,  
536 N.Y. & Klement, E. (2012). Mathematical modelling and evaluation of the different routes of  
537 transmission of lumpy skin disease virus. *Veterinary Research*, 43, 1.  
538 <https://doi.org/10.1186/1297-9716-43-1>
- 539 Mellor, P.S., Kitching, R.P. & Wilkinson, P.J. (1987). Mechanical transmission of capripox  
540 virus and African swine fever virus by *Stomoxys calcitrans*. *Research in Veterinary Science*,  
541 43, 109-112. [https://doi.org/10.1016/S0034-5288\(18\)30753-7](https://doi.org/10.1016/S0034-5288(18)30753-7)
- 542 Mercier, A., Arsevska, E., Bournez, L., Bronner, A., Calavas, D., Cauchard, J., Falala, S.,  
543 Caufour, P., Tisseuil, C., Lefrançois, T. & Lancelot, R. (2018). Spread rate of lumpy skin



- 544 disease in the Balkans, 2015-2016. *Transboundary and Emerging Diseases*, 65, 240-243.  
545 <https://doi.org/10.1111/tbed.12624>
- 546 Molaie, G., Huang, S. & Andreadis, T.G. (2012). Vector-host interactions of *Culex pipiens*  
547 complex in northeastern and southwestern USA. *Journal of the American Mosquito Control*  
548 *Association*, 28(Suppl4), 127-136. <https://doi.org/10.2987/8756-971X-28.4s.127>
- 549 Molla, W., de Jong, M.C.M. & Frankena, K. (2017). Temporal and spatial distribution of  
550 lumpy skin disease outbreaks in Ethiopia in the period 2000 to 2015. *BMC Veterinary*  
551 *Research*, 13, 310. <https://doi.org/10.1186/s12917-017-1247-5>
- 552 Molla, W., Frankena, K. & de Jong, M.C.M. (2017). Transmission dynamics of lumpy skin  
553 disease in Ethiopia. *Epidemiology and Infection*, 145, 2856-2863.  
554 <https://doi.org/10.1017/S0950268817001637>
- 555 Molla, W., de Jong, M.C.M., Gari, G. & Frankena, K. (2017). Economic impact of lumpy  
556 skin disease and cost effectiveness of vaccination for the control of outbreaks in Ethiopia.  
557 *Preventive Veterinary Medicine*, 147, 100-107.  
558 <https://doi.org/10.1016/j.prevetmed.2017.09.003>
- 559 Mullens, B.A., Gerry, A.C., Lysyk, T.J. & Schmidtman, E.T. (2004). Environmental effects  
560 on vector competence and virogenesis of bluetongue virus in *Culicoides*: interpreting  
561 laboratory data in a field context. *Veterinaria Italiana*, 40, 160-166.  
562 [http://www.izs.it/vet\\_italiana/2004/40\\_3/32.pdf](http://www.izs.it/vet_italiana/2004/40_3/32.pdf)
- 563 Plummer, M., Best, N., Cowles, K. & Vines, K. (2006). CODA: Convergence Diagnosis and  
564 Output Analysis for MCMC. *R News*, 6, 7-11. [https://cran.r-](https://cran.r-project.org/doc/Rnews/Rnews_2006-1.pdf)  
565 [project.org/doc/Rnews/Rnews\\_2006-1.pdf](https://cran.r-project.org/doc/Rnews/Rnews_2006-1.pdf)
- 566 Purse, B.V., Carpenter, S., Venter, G.J., Bellis, G. & Mullens, B.A. (2015). Bionomics of  
567 temperate and tropical *Culicoides* midges: knowledge gaps and consequences for

568 transmission of Culicoides-borne viruses. *Annual Review of Entomology*, 60, 373-392.  
569 <https://doi.org/10.1146/annurev-ento-010814-020614>

570 R Core Team 2018 R: A language and environment for statistical computing. R Foundation  
571 for Statistical Computing, Vienna, Austria. <http://www.R-project.org/>

572 Reisen, W.K., Fang, Y. & Martinez, V.M. (2006). Effects of temperature on the transmission  
573 of West Nile virus by *Culex tarsalis* (Diptera: Culicidae). *Journal of Medical Entomology*,  
574 43, 309-317. <https://doi.org/10.1093/jmedent/43.2.309>

575 Reiter, P. (2010). Yellow fever and dengue: a threat to Europe? *EuroSurveillance*, 15, 19509.  
576 <https://www.eurosurveillance.org/content/10.2807/es.e15.10.19509-en>

577 Ryan, S.J., Lippi, C.A., Boersch-Supan, P.H., Heydari, N., Silva, M., Adrian, J., Noblecilla,  
578 L.F., Ayala, E.B., Encalada, M.D., Larsen, D.A., Krisher, J.T., Krisher, L., Fregosi, L. &  
579 Stewart-Ibarra, A.M. (2017). Quantifying seasonal and diel variation in Anopheline and  
580 *Culex* human biting rates in Southern Ecuador. *Malaria Journal*, 16, 479.  
581 <https://doi.org/10.1186/s12936-017-2121-4>

582 Salem, A., Franc, M., Jacquiet, P., Bouhsira, E. & Lienard, E. (2012). Feeding and breeding  
583 aspects of *Stomoxys calcitrans* (Diptera: Muscidae) under laboratory conditions. *Parasite*, 19,  
584 309-317. <https://doi.org/10.1051/parasite/2012194309>

585 Scott, T.W., Amerasinghe, P.H., Morrison, A.C., Lorenz, L.H., Clark, G.G., Strickman, D.,  
586 Kittayapog, P. & Edman, J.D. (2000). Longitudinal studies of *Aedes aegypti* (Diptera:  
587 Culicidae) in Thailand and Puerto Rico: blood feeding frequency. *Journal of Medical*  
588 *Entomology*, 37, 89-101. <https://doi.org/10.1603/0022-2585-37.1.77>

589 Sinka, M.E., Bangs, M.J., Manguin, S., Coetzee, M., Mbogo, C.M., Hemingway, J., Patil,  
590 A.P., Temperley, W.H., Gething, P.W., Kabaria, C.W., Okara, R.M., Van Boekel, T.,  
591 Godfray, H.C.J., Harbach, R.E. & Hay, S.I. (2010). The dominant Anopheles vectors of

592 human malaria in Africa, Europe and the Middle East: occurrence data, distribution maps and  
593 bionomic précis. *Parasites & Vectors*, 3, 117. <https://doi.org/10.1186/1756-3305-3-117>

594 Skovgård, H. & Nachman, G. (2017). Modeling the temperature- and age-dependent survival,  
595 development, and oviposition rates of stable flies (*Stomoxys calcitrans*) (Diptera: Muscidae).  
596 *Environmental Entomology*, 46, 1130-1142. <https://doi.org/10.1093/ee/nvx118>

597 Tasioudi, K.E., Antoniou, S.E., Iliadou, P., Sachpatzidis, A., Plevraki, E., Agianniotaki, E.I.,  
598 Fouki, C., Mangana-Vougiouka, O., Chondrokouki, E. & Dile, C. (2016). Emergence of  
599 lumpy skin disease in Greece, 2015. *Transboundary and Emerging Diseases*, 63, 260-265.  
600 <https://doi.org/10.1111/tbed.12497>

601 Taylor, D.B., Moon, R.D. & Mark, D.R. (2012). Economic impact of stable flies (Diptera:  
602 Muscidae) on dairy and beef cattle production. *Journal of Medical Entomology*, 49, 198-209.  
603 <https://doi.org/10.1603/ME10050>

604 Tuppurainen, E.S.M., Venter, E.H. & Coetzer, J.A.W. (2005). The detection of lumpy skin  
605 disease virus in samples of experimentally infected cattle using different diagnostic  
606 techniques. *Onderstepoort Journal of Veterinary Research*, 72, 153-164.  
607 <https://doi.org/10.4102/ojvr.v72i2.213>

608 Tuppurainen, E.S. & Oura, C.A.L. (2012). Lumpy skin disease: an emerging threat to Europe,  
609 the Middle East and Africa. *Transboundary and Emerging Diseases*, 59, 40-48.  
610 <https://doi.org/10.1111/j.1865-1682.2011.01242.x>

611 Tuppurainen, E.S., Lubinga, J.C., Stoltz, W.H., Troskie, M., Carpenter, S.T., Venter, E.H. &  
612 Oura, C.A. (2013). Mechanical transmission of lumpy skin disease virus by *Rhipicephalus*  
613 *appendiculatus* male ticks. *Epidemiology and Infection*, 141, 425-430.  
614 <https://doi.org/10.1017/S0950268812000805>

615 Weiss, K.E. (1968). Lumpy skin disease. In: *Virology Monographs* 3 (pp. 111-131). Vienna:  
616 Springer-Verlag. [https://doi.org/10.1007/978-3-662-39771-8\\_3](https://doi.org/10.1007/978-3-662-39771-8_3)

**Table 1.** Life history parameters for five putative insect vectors of lumpy skin disease virus.

| parameter                           | symbol   | range     | comments                                                                                              | references                                                              |
|-------------------------------------|----------|-----------|-------------------------------------------------------------------------------------------------------|-------------------------------------------------------------------------|
| <i>Stomoxys calcitrans</i>          |          |           |                                                                                                       |                                                                         |
| biting rate (day <sup>-1</sup> )    | <i>a</i> | 0.33-6    | time interval between blood meals (1/ <i>a</i> ) of 4-72 hours                                        | Salem et al. (2013); Baldacchino et al. (2013)                          |
| vector to host ratio                | <i>m</i> | 30-145    | -                                                                                                     | Kunz & Monty (1976); Jacquet et al. (2014)                              |
| mortality rate (day <sup>-1</sup> ) | $\mu$    | 0.04-0.11 | median lifespan (1/ $\mu$ ) of 9-26 days                                                              | Salem et al. (2013); Skovgård & Nachman (2017)                          |
| <i>Culicoides nubeculosus</i>       |          |           |                                                                                                       |                                                                         |
| biting rate (day <sup>-1</sup> )    | <i>a</i> | 0-0.4     | based on duration of gonotrophic cycle                                                                | Birley & Boorman (1982); Braverman et al. (1985); Mullens et al. (2004) |
| vector to host ratio                | <i>m</i> | 0-5000    | based on a maximum host biting rate ( $m \times a$ ) of 2500 bites per host per day                   | Gerry et al. (2001)                                                     |
| mortality rate (day <sup>-1</sup> ) | $\mu$    | 0.1-0.5   | based on proportion of females surviving gonotrophic cycle                                            | Birley & Boorman (1982); Braverman et al. (1985)                        |
| <i>Aedes aegypti</i>                |          |           |                                                                                                       |                                                                         |
| biting rate (day <sup>-1</sup> )    | <i>a</i> | 0.18-0.23 | -                                                                                                     | Scott et al. (2000); Liu-Helmersson et al. (2014)                       |
| vector to host ratio                | <i>m</i> | 0-80      | modelled ratio of <i>Aedes</i> to cattle                                                              | Gachohi et al. (2016)                                                   |
| mortality rate (day <sup>-1</sup> ) | $\mu$    | 0.07-0.2  | lifespan of 5-15 days estimated using a modelling analysis of 50 mark-release-recapture field studies | Brady et al. (2013)                                                     |
| <i>Anopheles stephensi</i>          |          |           |                                                                                                       |                                                                         |
| biting rate (day <sup>-1</sup> )    | <i>a</i> | 0.25-0.5  | time interval between blood meals (1/ <i>a</i> ) of 2-4 days                                          | Killeen et al. (2000); Charlwood et al. (2016)                          |
| vector to host ratio                | <i>m</i> | 0.6-60    | based on a host biting rate ( $m \times a$ ) of around 2 to 120 bites per host per day                | Killeen et al. (2000); Ryan et al. (2017)                               |
| mortality rate (day <sup>-1</sup> ) | $\mu$    | 0.02-0.38 | daily survival probability ( $\exp(-\mu)$ ) of 0.68-0.98                                              | Kiszewski et al. (2004)                                                 |

| parameter                           | symbol   | range     | comments                                                      | references                                     |
|-------------------------------------|----------|-----------|---------------------------------------------------------------|------------------------------------------------|
| <i>Culex quinquefasciatus</i>       |          |           |                                                               |                                                |
| biting rate (day <sup>-1</sup> )    | <i>a</i> | 0.08-0.25 | time interval between blood meals (1/ <i>a</i> ) of 4-12 days | Griffith & Turner (1996); Reisen et al. (2006) |
| vector to host ratio                | <i>m</i> | 0-80      | modelled ratio of <i>Culex</i> to cattle                      | Gachohi et al. (2016)                          |
| mortality rate (day <sup>-1</sup> ) | $\mu$    | 0.07-0.84 | -                                                             | Gad et al. (1989); Jones et al. (2012)         |

**Table 2.** Parameters for mechanical transmission of lumpy skin disease virus for five species of biting insect.

| species                     | virus inactivation rate<br>( $\gamma$ ; day <sup>-1</sup> ) |                     | mean duration of infection<br>(1/ $\gamma$ ; days) |               | probability of transmission<br>from bovine to insect ( $\beta$ ) |              | probability of transmission<br>from insect to bovine ( $b$ ) |               |
|-----------------------------|-------------------------------------------------------------|---------------------|----------------------------------------------------|---------------|------------------------------------------------------------------|--------------|--------------------------------------------------------------|---------------|
|                             | estimate <sup>†</sup>                                       | 95% CI <sup>‡</sup> | estimate                                           | 95% CI        | estimate                                                         | 95% CI       | estimate                                                     | 95% CI        |
| <i>S. calcitrans</i> §      | 1.71                                                        | (0.80, 3.34)        | 0.58                                               | (0.30, 1.26)  | 0.46                                                             | (0.23, 0.71) | 0.07                                                         | (0.002, 0.64) |
| <i>C. nubeculosus</i> §     | 71.16                                                       | (4.65, 390.0)       | 0.01                                               | (0.003, 0.22) | 0.27                                                             | (0.09, 0.54) | 0.50                                                         | (0.03, 0.98)  |
| <i>Ae. aegypti</i>          | 0.09                                                        | (0.01, 0.19)        | 11.23                                              | (5.19, 79.11) | 0.90                                                             | (0.64, 0.99) | 0.48                                                         | (0.04, 0.97)  |
| <i>An. stephensi</i>        | 0.24                                                        | (0.10, 0.42)        | 4.08                                               | (2.38, 9.64)  | 0.61                                                             | (0.36, 0.83) | 0.03                                                         | (0.001, 0.16) |
| <i>Cx. quinquefasciatus</i> | 0.34                                                        | (0.17, 0.55)        | 2.96                                               | (1.81, 5.74)  | 0.72                                                             | (0.47, 0.91) | 0.04                                                         | (0.002, 0.28) |

<sup>†</sup> posterior median

<sup>‡</sup> CI: credible interval

§ estimates are shown for the analysis assuming 100 insects refed when attempting transmission to cattle

**Table 3.** Parameters for latent and infectious periods for lumpy skin disease virus in cattle.

| proxy measure                   | shape parameter |             | mean (days) |              |
|---------------------------------|-----------------|-------------|-------------|--------------|
|                                 | estimate†       | 95% CI‡     | estimate†   | 95% CI‡      |
| <i>latent period (days)</i>     |                 |             |             |              |
| skin lesions                    | 25.4            | (4.8, 82.7) | 7.3         | (5.9, 9.7)   |
| blood (PCR)                     | 3.4             | (1.6, 6.4)  | 5.8         | (4.4, 7.8)   |
| blood (VI)                      | 5.7             | (1.8, 13.6) | 8.1         | (5.9, 12.1)  |
| <i>infectious period (days)</i> |                 |             |             |              |
| skin lesions                    | 10.4            | (2.1, 36.1) | 23.1        | (16.4, 36.2) |
| blood (PCR)                     | 3.1             | (1.1, 7.1)  | 16.3        | (11.4, 25.4) |
| blood (VI)                      | 2.6             | (0.7, 6.7)  | 8.8         | (5.5, 17.8)  |

† posterior median

‡ CI: credible interval

**Table 4.** Basic reproduction number<sup>†</sup> ( $R_0$ ) for lumpy skin disease virus (LSDV) for five species of biting insect.

| species                     | proxy measure of infectiousness |                  |                 |
|-----------------------------|---------------------------------|------------------|-----------------|
|                             | skin lesions                    | blood (PCR)      | blood (VI)      |
| <i>S. calcitrans</i> ‡      | 15.5 (1.4, 81.9)                | 13.1 (1.2, 70.8) | 9.7 (0.9, 51.7) |
| <i>C. nubeculosus</i> ‡     | 1.8 (0.06, 13.5)                | 1.5 (0.05, 11.3) | 1.1 (0.04, 8.8) |
| <i>Ae. aegypti</i>          | 7.4 (1.3, 17.6)                 | 6.3 (1.1, 14.5)  | 4.6 (0.8, 11.2) |
| <i>An. stephensi</i>        | 1.6 (0.2, 6.0)                  | 1.4 (0.2, 5.0)   | 1.0 (0.1, 3.9)  |
| <i>Cx. quinquefasciatus</i> | 0.8 (0.09, 3.5)                 | 0.7 (0.08, 2.8)  | 0.5 (0.06, 2.2) |

<sup>†</sup> median (95% prediction interval) based on replicated Latin hypercube sampling

<sup>‡</sup> estimates are shown for the analysis assuming 100 insects refed when attempting transmission to cattle



**Figure 1.** Proportion of biting insects positive for viral DNA after feeding on a bovine infected with lumpy skin disease virus. Results are shown for five species of biting insect: (a) *Stomoxys calcitrans*; (b) *Culicoides nubeculosus*; (c) *Aedes aegypti*; (d) *Anopheles stephensi*; and (e) *Culex quinquefasciatus*. Each plot shows the observed proportion of infected insects (open squares), the expected proportion of infected insects (black line: posterior median; shading: percentiles of the posterior distribution in 5% bands from 5% to 95%) and the posterior predictive distribution for the proportion of infected insects (grey circles: median; grey error bars: 95% prediction intervals).

**Figure 2.** Parameters for mechanical transmission of lumpy skin disease virus by five species of biting insect: (a) virus inactivation rate ( $\gamma$ ; day<sup>-1</sup>); (b) probability of transmission from bovine to insect ( $\beta$ ; Pr(B to I)); and (c) probability of transmission from insect to bovine ( $b$ ; Pr(I to B)). Each plot shows the median (black circle), 25th and 75th percentiles (black line) and density (shape) for the marginal posterior distribution. Results shown for *S. calcitrans* and *C. nubeculosus* assume 100 insects refed when attempting transmission to cattle.

**Figure 3.** Basic reproduction number ( $R_0$ ) for lumpy skin disease virus (LSDV) when transmitted by *Stomoxys calcitrans*, *Culicoides nubeculosus*, *Aedes aegypti*, *Anopheles stephensi* or *Culex quinquefasciatus*. The estimated values for  $R_0$  are shown for three proxy measures of infectiousness: detection of virus or viral DNA in skin lesions (light grey); detection of viral DNA in blood (mid grey); or detection of virus in blood (dark grey). Box and whisker plots show the median (black horizontal line), interquartile range (coloured box) and 95% range (whiskers) based on replicated Latin hypercube sampling (100 replicates with the range for each parameter subdivided into 100 steps). Results shown for *S. calcitrans* and

*C. nubeculosus* used the posterior distributions assuming 100 insects refed when attempting transmission to cattle.

**Figure 4.** Sensitivity analysis of the basic reproduction number ( $R_0$ ) for lumpy skin disease virus (LSDV) when transmitted by: (a) *Stomoxys calcitrans*; (b) *Culicoides nubeculosus*; (c) *Aedes aegypti*; (d) *Anopheles stephensi*; or (e) *Culex quinquefasciatus*. Plots show the partial rank correlation coefficients (PRCC) for each parameter when the estimated values for  $R_0$  are calculated using three proxy measures of infectiousness: detection of virus or viral DNA in skin lesions (light grey); detection of viral DNA in blood (mid grey); or detection of virus in blood (dark grey). Box and whisker plots show the median (black horizontal line), interquartile range (coloured box) and 95% range (whiskers) for the PRCCs based on replicated Latin hypercube sampling (100 replicates with the range for each parameter subdivided into 100 steps). Results shown for *S. calcitrans* and *C. nubeculosus* used the posterior distributions assuming 100 insects refed when attempting transmission to cattle.

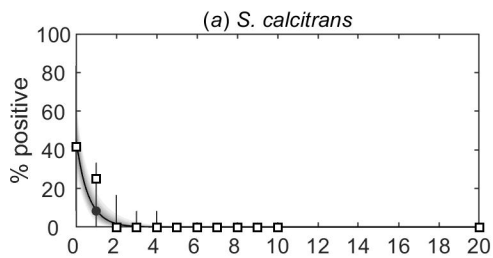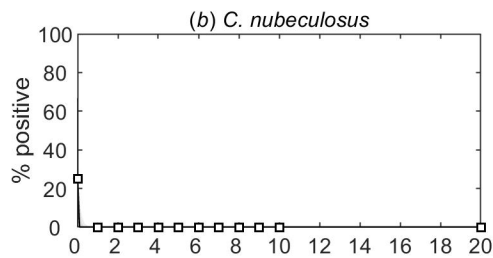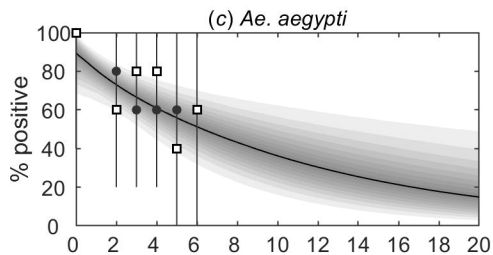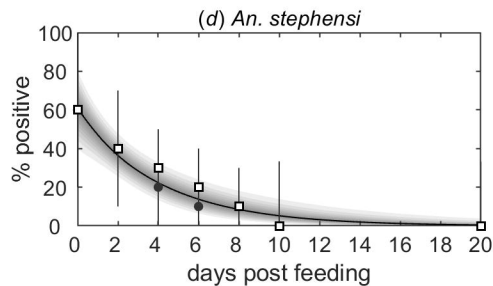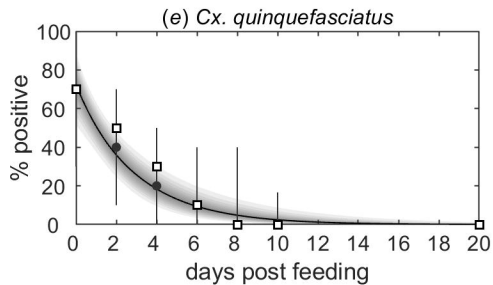

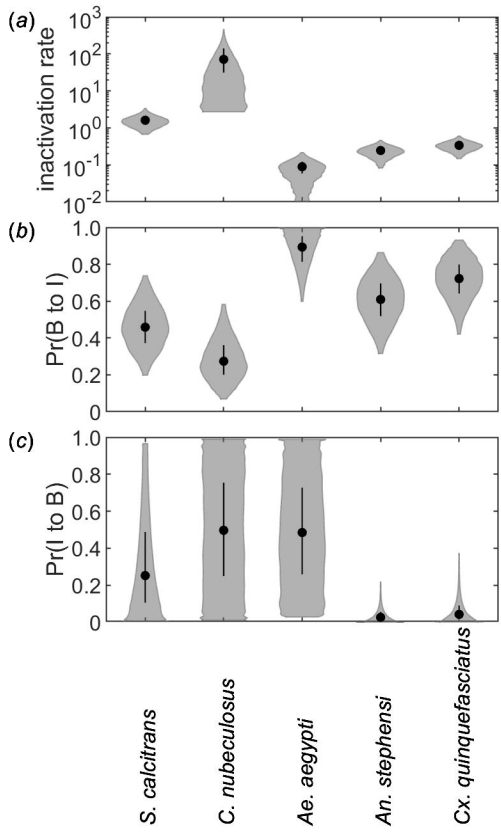

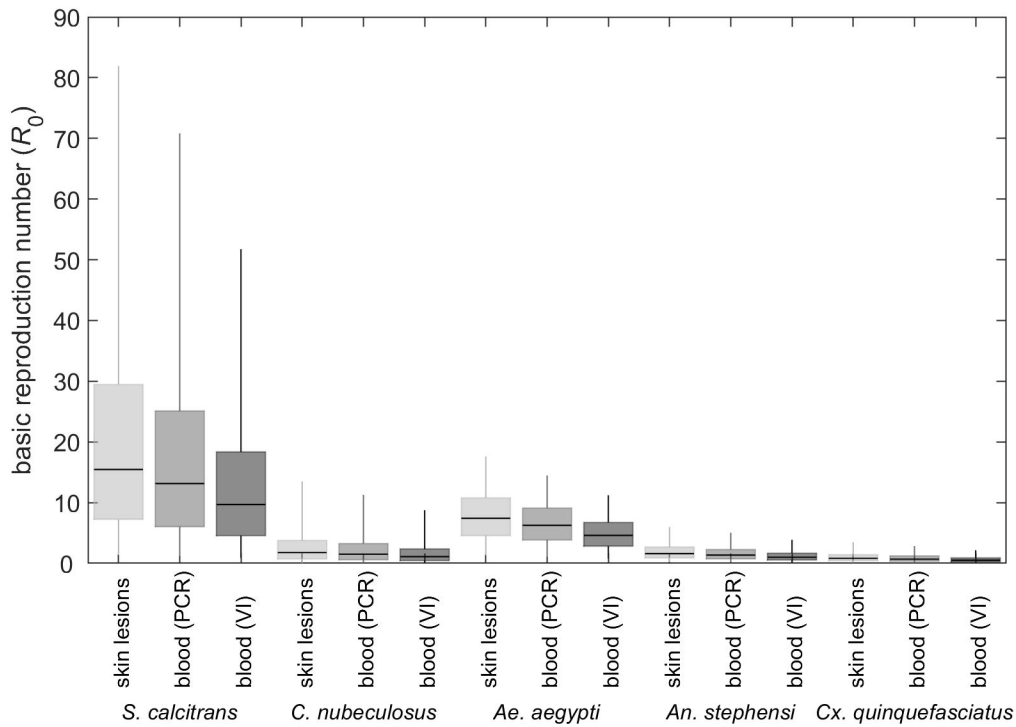

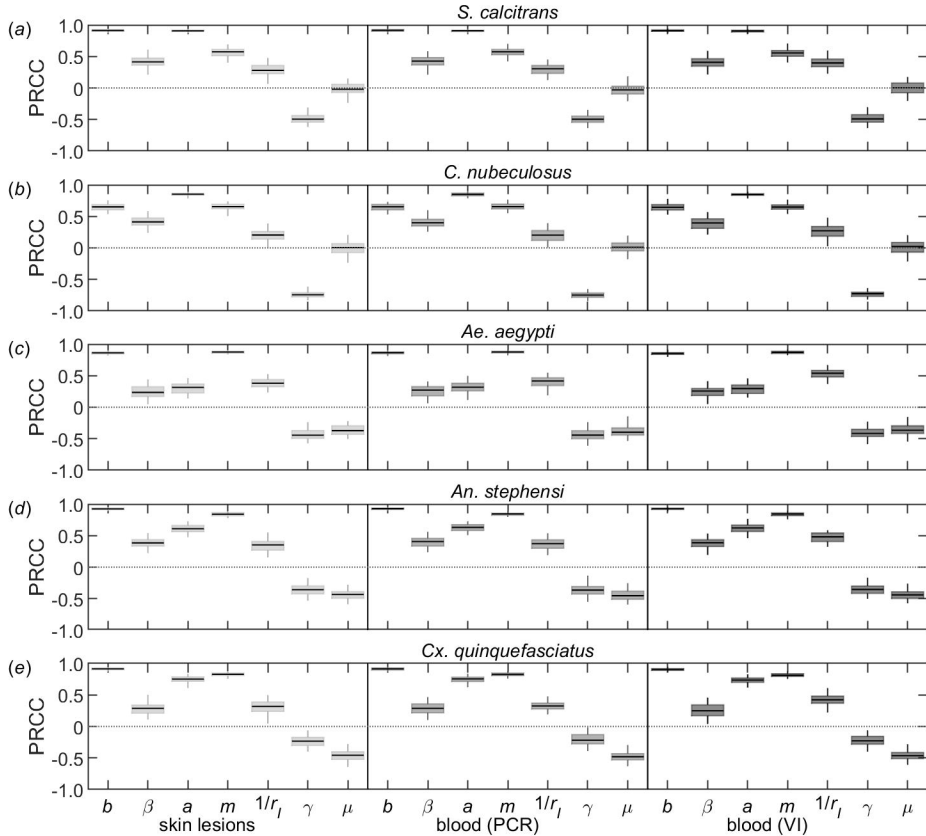

Source: https://www.biorxiv.org/content/10.1101/602292v2.full.pdf
